# Supplementary material
Source: publisher figshare collection journal article supplement (https://acs.figshare.com/ndownloader/files/4322275)

Supplementary information for:

## Structural Transitions in MOF: View from Outside and Inside

Alexander V. Neimark, François-Xavier Coudert, Carles Triguero,  
Anne Boutin, Alain H. Fuchs, Isabelle Beurroies and Renaud Denoyel

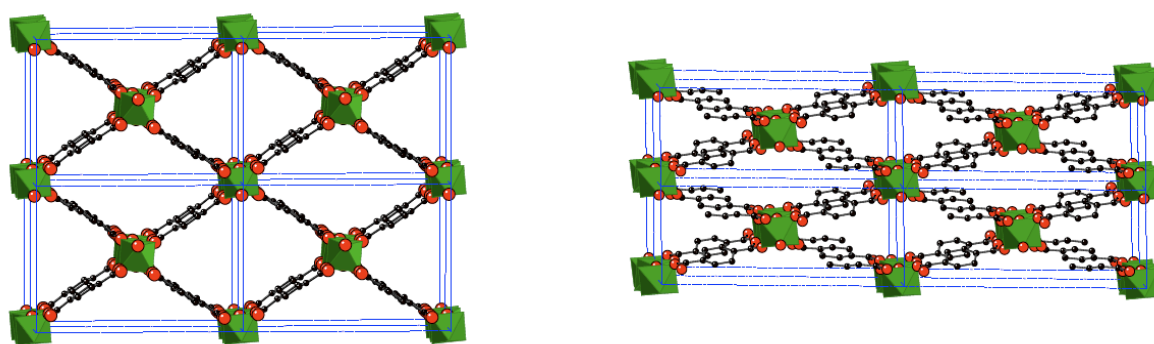

**Figure S1:** 2 x 2 x 2 supercell of the large-pore (**lp**, left) and narrow-pore (**np**, right) forms of the MIL-53 structure, viewed along the axis of the unidimensional channels<sup>[1,2]</sup>.

[1] C. Serre, F. Millange, C. Thouvenot, M. Nogués, G. Marsolier, D. Louer, G. Férey, *J. Am. Chem. Soc.* **2002**, *124*, 13519.

[2] C. Serre, S. Bourrelly, A. Vimont, N. Ramsahye, G. Maurin, P. L. Llewellyn, M. Daturi, Y. Filinchuk, O. Leynaud, P. Barnes, G. Férey, *G. Adv. Mater.* **2007**, *19*, 2246.

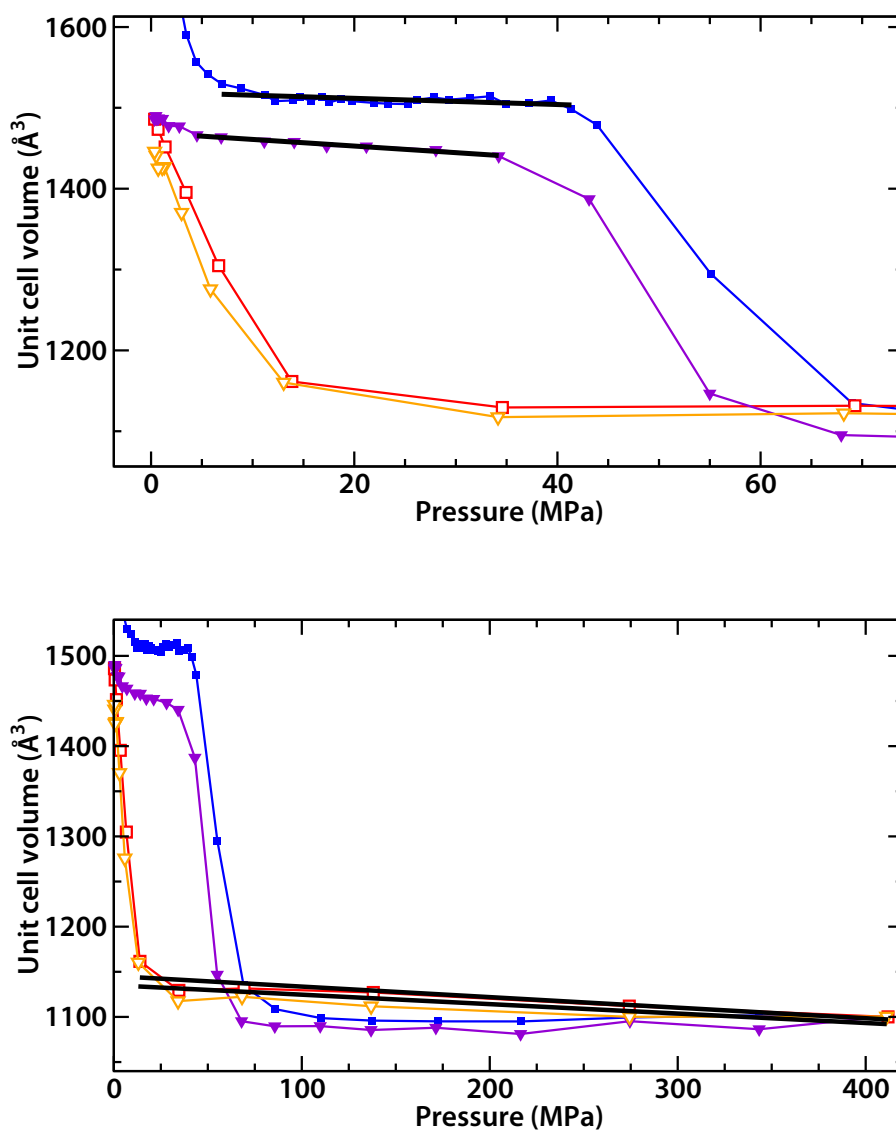

**Figure S2:** Fits of the linear deformation regimes of the mercury intrusion/extrusion data from which the bulk moduli of the **lp** (top graph) and **np** (bottom graph) phases of MIL-53 (Cr) were calculated. The blank-corrected experimental data is in color, and the black lines are the fits of the linear regions.

## Description of the geometrical model for the interpretation of in situ XRD

In this section, we describe how a simple geometric model can be applied to the in situ X-ray diffraction patterns measured upon CO<sub>2</sub> adsorption and desorption in MIL-53 (Cr). Using this model, the slight variations in XRD peak positions upon CO<sub>2</sub> adsorption and desorption were linked to the evolutions of the unit cell volume of the material.

We have studied the peak around  $2\theta \sim 4^\circ$  for the **lp** phase, which corresponds to the (101) crystallographic plane. For the **np** phase, we used the peak at  $2\theta \sim 5^\circ$ , which corresponds to the (110) plane (the unit cell is oriented differently, with the unidimensional channel axis being the *b* axis for the **lp** structure, and the *c* axis for **np**). The diffraction angle  $\theta$  is linked to the interplanar spacing  $d$  by the Bragg law ( $n\lambda = 2d \sin \theta$ ), and the interplanar spacing can be correlated to the unit cell volume  $V_c$  and our geometric order parameter, the lozenge angle  $\varphi$ :

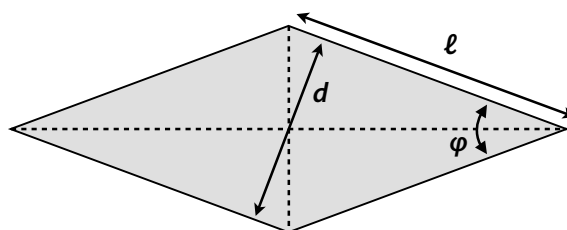

To do that, we assume that linker length  $l$  is constant for each phase ( $l_{\text{lp}} = 10.606 \text{ \AA}$ ,  $l_{\text{np}} = 10.325 \text{ \AA}$ ), and that all deformation comes from the variation of the angle  $\varphi$ . Geometric considerations then lead for the **lp** structure to  $\varphi = \arccos(d/l)$ ,  $V_c = 2cld$  for the **lp** phase, and  $V_c = 2dlb \sin \beta$  for the **np** structure. Evolution of diffraction peak position  $2\theta$  and lozenge angle  $\varphi$  with adsorption are shown below, while the unit cell volume for the **lp** phase is Figure 4 of the main text.

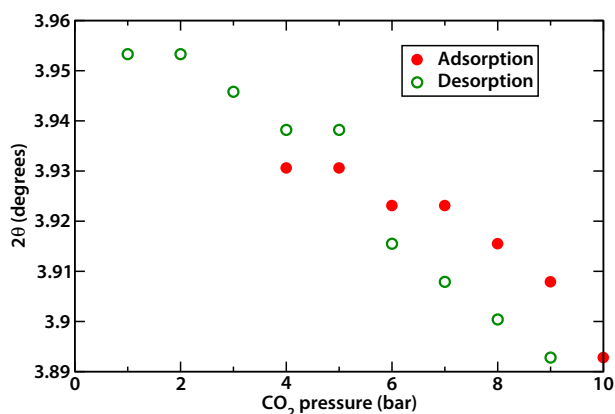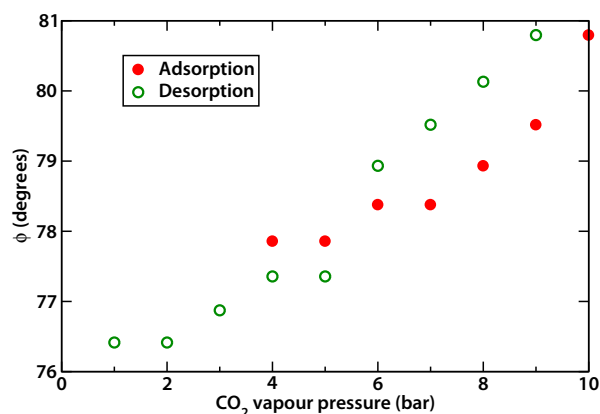

Supplement: Supplementary file 1 [file 4322275]
